# Supplementary material for: Photo-Protective Mechanisms and the Role of Poly (ADP-Ribose) Polymerase Activity in a Facultative CAM Plant Exposed to Long-Term Water Deprivation
Source: PubMed Central journal article supplement (PMC7570031; doi:10.3390/plants9091192), 2020-09-12
Supplement: plants-09-01192-s001.pdf [file plants-09-01192-s001.pdf]

**Table S1.** Coefficients of correlation (Pearson's test) among the leaf investigated parameters: daily fluctuation of titratable acidity, TA; effective quantum yield of PSII photochemistry,  $\Phi_{PSII}$ ; regulated energy dissipation,  $\Phi_{NPQ}$ ; non-regulated energy dissipation,  $\Phi_{NO}$ ; electron transport rate, ETR; photochemical quenching, qL; maximum photochemical efficiency of PSII,  $F_v/F_m$ ; hydrogen peroxide,  $H_2O_2$ ; superoxide dismutase, SOD; peroxidase, POD; catalase, CAT; water-soluble antioxidants, WS-Antiox; lipo-soluble antioxidants, LS-Antiox; poly(ADP-Ribose) polymerase, PARP.

|               | TA | $\Phi_{PSII}$ | $\Phi_{NPQ}$ | $\Phi_{NO}$   | ETR           | qL     | $F_v/F_m$     | $H_2O_2$      | SOD     | POD          | CAT          | WS-Antiox     | LS-Antiox     | PARP    |
|---------------|----|---------------|--------------|---------------|---------------|--------|---------------|---------------|---------|--------------|--------------|---------------|---------------|---------|
| TA            | 1  | 0.659         | -0.361       | -0.606        | 0.657         | 0.170  | 0.553         | -0.445        | 0.355   | 0.368        | 0.404        | -0.282        | -0.243        | 0.257   |
| $\Phi_{PSII}$ |    | 1             | -0.369       | <b>-0.968</b> | <b>1</b>      | -0.544 | <b>0.974</b>  | <b>-0.815</b> | -0.0326 | -0.141       | -0.095       | 0.283         | 0.401         | -0.305  |
| $\Phi_{NPQ}$  |    |               | 1            | 0.125         | -0.369        | -0.196 | -0.172        | 0.511         | -0.256  | -0.234       | -0.237       | 0.452         | 0.332         | -0.191  |
| $\Phi_{NO}$   |    |               |              | 1             | <b>-0.968</b> | 0.634  | <b>-0.994</b> | 0.732         | 0.104   | 0.214        | 0.165        | -0.436        | -0.534        | 0.132   |
| ETR           |    |               |              |               | 1             | -0.546 | <b>-0.974</b> | <b>-0.816</b> | -0.0339 | -0.143       | -0.0964      | 0.284         | 0.403         | -0.0764 |
| qL            |    |               |              |               |               | 1      | -0.689        | 0.468         | 0.462   | 0.517        | 0.488        | -0.475        | -0.580        | 0.326   |
| $F_v/F_m$     |    |               |              |               |               |        | 1             | -0.773        | -0.149  | -0.262       | -0.217       | 0.455         | 0.570         | -0.130  |
| $H_2O_2$      |    |               |              |               |               |        |               | 1             | 0.462   | 0.517        | 0.488        | -0.475        | -0.580        | -0.383  |
| SOD           |    |               |              |               |               |        |               |               | 1       | <b>0.980</b> | <b>0.987</b> | <b>-0.988</b> | <b>-0.967</b> | -0.507  |
| POD           |    |               |              |               |               |        |               |               |         | 1            | <b>0.997</b> | <b>-0.983</b> | <b>-0.970</b> | -0.364  |
| CAT           |    |               |              |               |               |        |               |               |         |              | 1            | <b>-0.975</b> | <b>-0.968</b> | -0.378  |
| WS-Antiox     |    |               |              |               |               |        |               |               |         |              |              | 1             | <b>0.973</b>  | 0.352   |
| LS-Antiox     |    |               |              |               |               |        |               |               |         |              |              |               | 1             | 0.251   |
| PARP          |    |               |              |               |               |        |               |               |         |              |              |               |               | 1       |

Data are means (n=10)  $\pm$  SE. The significant Pearson's correlation coefficients are reported in bold ( $p \leq 0.05$ ).
